# Supplementary material
Source: MDPI journal article supplement (https://www.mdpi.com/2073-4344/11/10/1169)
Supplement: s1 [file s1 › catalysts-1348727-supplementary.pdf]

## supplementary material

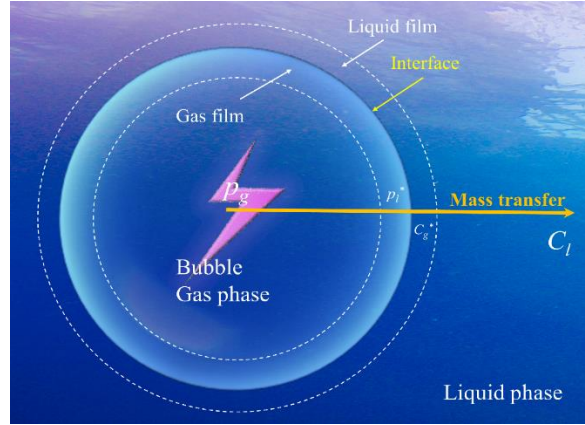

**Figure S1.** The plasma-mass transfer model in a bubble

Based on the two-film theory, the plasma-mass transfer was proposed in Fig. S1. The reactive species attributed to discharge in the bubble transfer into liquid phase through the interface. For explaining the relationship between the parameter of bubble discharge and mass transfer, plasma-mass transfer model was proposed.  $C_g^*$  is liquid film concentration of reactive species that would be in equilibrium with the bulk gas partial pressure  $p_g$  of reactive species generated by air ionization.  $p_l^*$  is gas film partial pressure of reactive species that would be in equilibrium with the concentration  $C_l$  of bulk liquid phase. The partial pressure  $p_g$  of the active particles is related to the discharge voltage and number of discharge times. The higher the discharge voltage and the more discharge times, the higher the partial pressure of active particles. Meanwhile, discharge in bubble will heat the gas and accelerate the expansion of bubble, which will affect the mass transfer time.

**Table S1.** The pseudo-first-order kinetic constant under different initial solution temperature

| Initial solution temperature | Pseudo-first-order kinetic      | R <sup>2</sup> |
|------------------------------|---------------------------------|----------------|
| (K)                          | constant k (min <sup>-1</sup> ) |                |
| 278                          | 0.175                           | 0.911          |
| 288                          | 0.261                           | 0.968          |
| 297                          | 0.376                           | 0.956          |
| 323                          | 0.196                           | 0.960          |
| 343                          | 0.170                           | 0.897          |

## LC-MS

LC: Agilent UPLC 1260      MS: G6530 Q-TOF-MS

**Table S2.** The main parameter of LC-MS for the analysis of decomposed products

| Project               | parameters              | Value            |
|-----------------------|-------------------------|------------------|
| Source parameters     | Gas temperature (°C)    | 325              |
|                       | Gas flow (L/min)        | 10               |
| Scan segments         | Scan Seg # Ion Polarity | 1 Positive       |
| Scan Source Parameter | VCap                    | 4000             |
|                       | Fragmentor              | 150              |
| Binary Pump           | Flow                    | 0.300 mL/min     |
| Solution Composition  | Chanel A                | MeOH + ACN       |
|                       | Chanel B                | H <sub>2</sub> O |

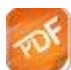

LC-MS parameter for degradation analysis.pdf

The detailed parameter was shown in the PDF attached in this file. (Double click to open PDF file)
